# Supplementary material for: Correlation of the Osteoarthritis Susceptibility Variants That Map to Chromosome 20q13 With an Expression Quantitative Trait Locus Operating on NCOA3 and With Functional Variation at the Polymorphism rs116855380
Source: PubMed Central journal article supplement (PMC4832313; doi:10.1002/art.39278), 2015-10-28
Supplement: ART-67-2923-s001.pdf [file ART-67-2923-s001.pdf]

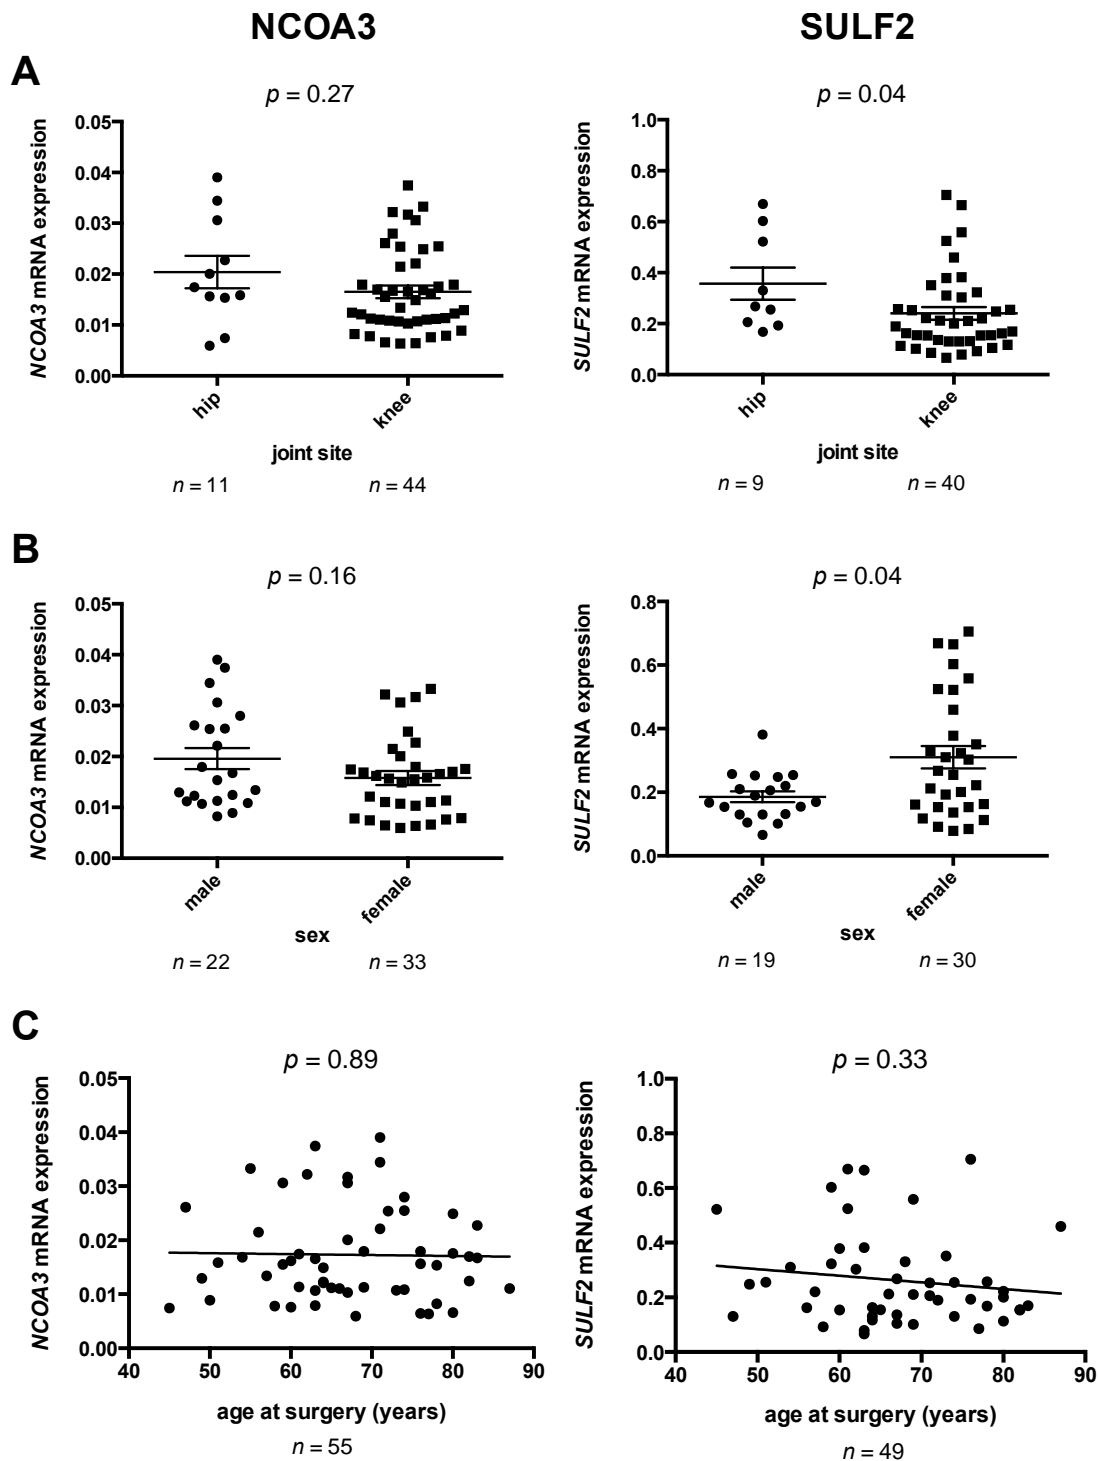

**Figure S1.** Scatter plots of the quantitative expression of *NCOA3* (left) and *SULF2* (right) in osteoarthritis (OA) cartilage. Data is stratified by (A) joint site, (B) sex and (C) age at surgery. The data points represent the average of the three replicates for each sample. The expression of each gene was assessed by quantitative real-time reverse transcription PCR and normalized to the housekeeping genes *18S*, *GAPDH* and *HPRT1*. *n* is the number of patients studied. The horizontal lines in the columnar scatter plots represent the mean and the standard error of the mean. The trendlines in the XY scatter plots represent linear regression of the data. *p*-values for (A) and (B) were calculated using a two-tailed Mann-Whitney exact test. *p*-values for (C) were calculated using linear regression.

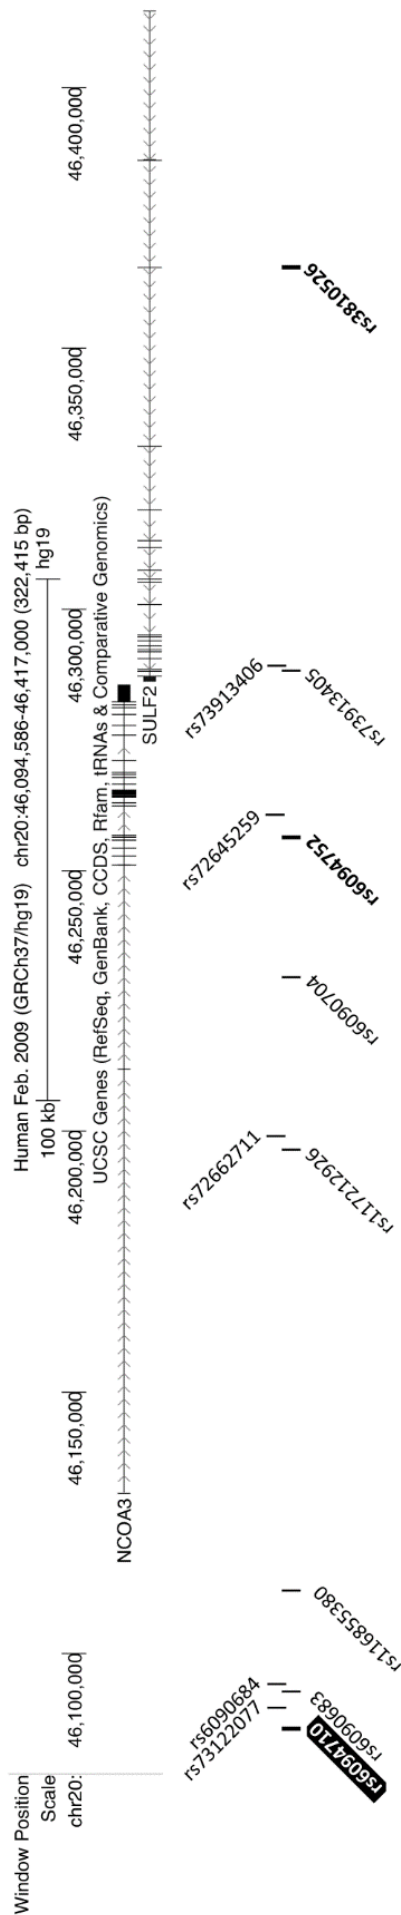

**Figure S2.** Schematic representation of the 20q13 locus. Gene track is a screenshot from <http://genome.ucsc.edu>, using release hg19. The genes are represented by horizontal lines, with the arrows indicating the direction of gene transcription. The exons are represented by vertical bars, whose width is proportional to the length of the exon. The numbers above the gene tracks indicate the position within chromosome 20. The vertical lines beneath the gene tracks represent the SNPs analyzed in this study. The SNP that identified the signal in the GWAS, rs6094710, is labeled in white text on a black background, and the two transcript SNPs used for AEI, rs6094752 (*NCOA3*) and rs3810526 (*SULF2*), are labeled with **bold** text. Also labeled are the other SNPs in perfect LD with rs6094710.

**A SW872**

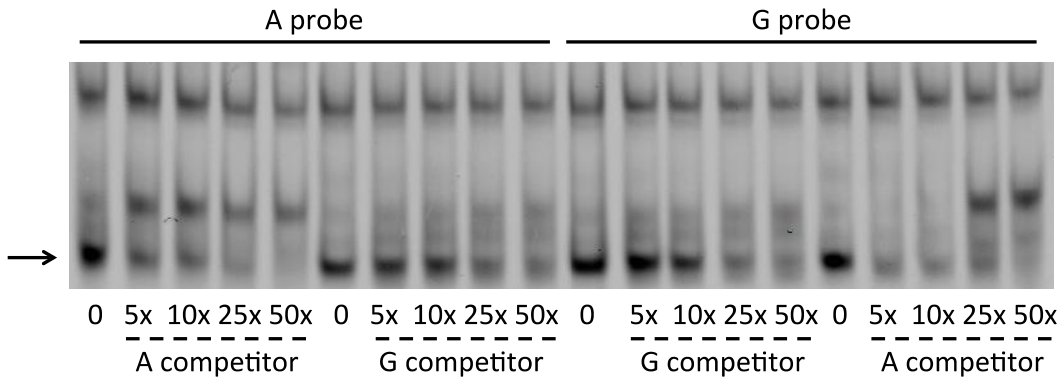

**B SW872**

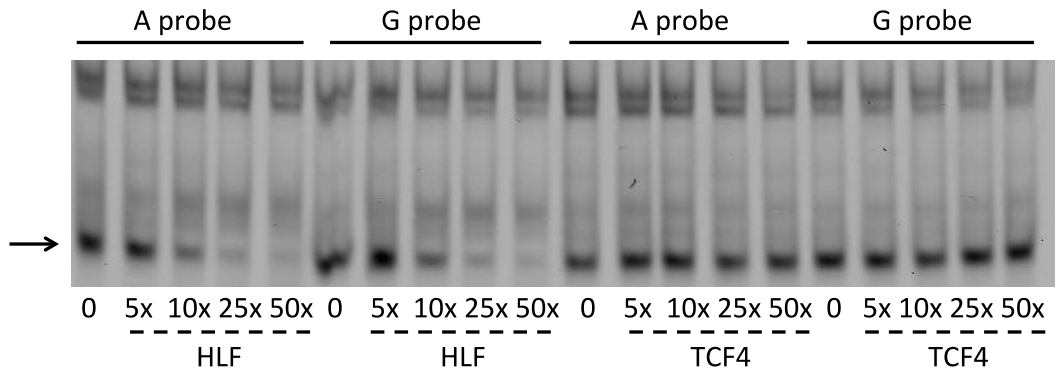

**C SW1353**

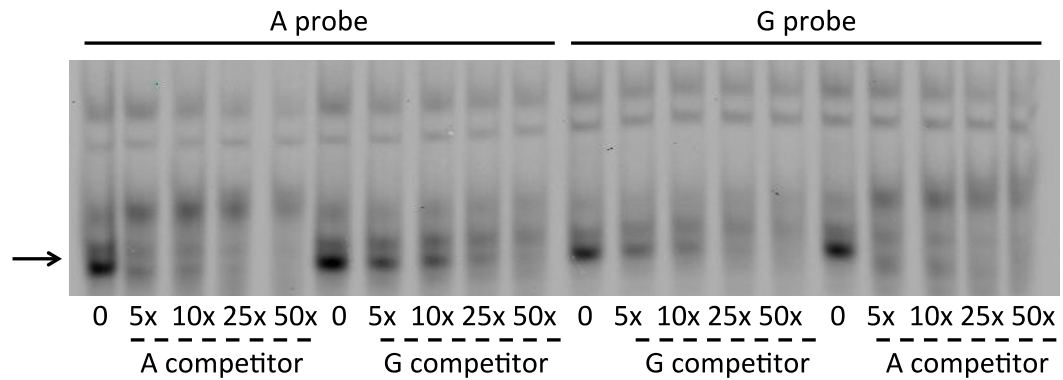

**D SW1353**

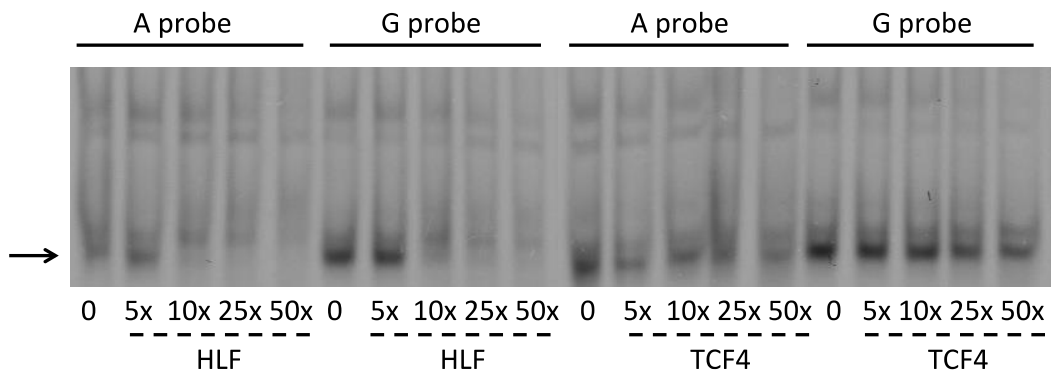

**Figure S3.** Electrophoretic mobility shift assay (EMSA) analysis in SW872 (A and B) and SW1353 cells (C and D). (A and C) Increasing concentrations of unlabeled G and A allele competitor were added to the EMSA reaction containing the G and A allele probes and nuclear extract, with the arrow indicating the specific complex binding to the probes. (B and D) The addition of increasing concentrations of HLF and TCF4 unlabeled consensus competitors to the EMSA reaction containing the G or A allele probe. The arrow indicates the complex that is competed.

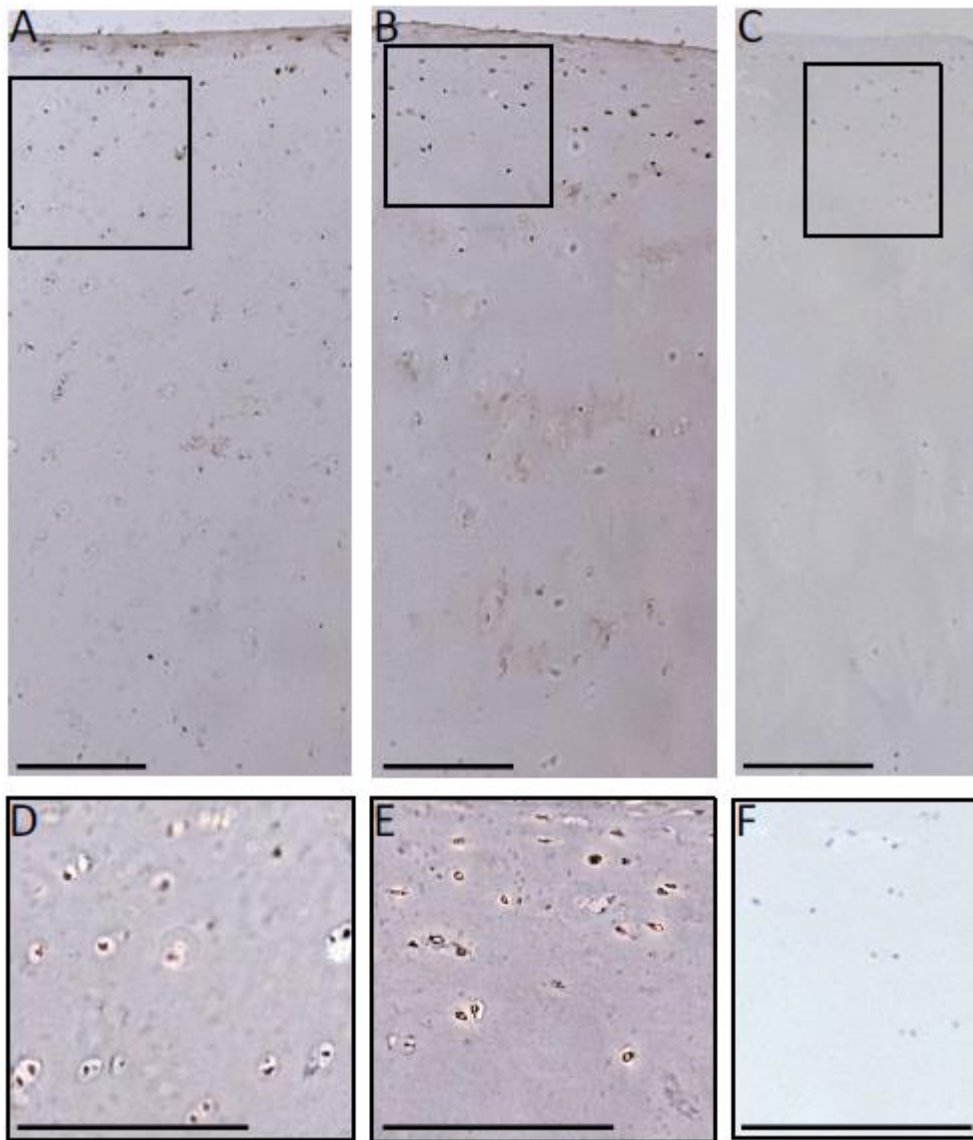

**Figure S4.** Expression of NCOA3 in cartilage tissue. (A,B,D,E) Immunohistochemical staining against NCOA3 in macroscopically normal knee (A and D) and hip (B and E) cartilage obtained from osteoarthritis patients. (C and F) Negative control staining with no primary antibody in the same hip sample as shown in B and E. The articular surface is at the top of the images. Top panels (A-C) were taken at 5x magnification; bottom panels (D-F) show enlarged views taken at 10x magnification. Cells exhibit nuclear staining, which is consistent with the role of NCOA3 as a co-activator of various nuclear receptors. Enlarged regions are indicated by the black boxes in A-C. Scale bars = 200  $\mu$ m.

**Table S1.** Table of OA patient characteristics, their genotype at rs6094710 and details of their use in quantitative real-time reverse transcription PCR (RT-PCR). F, female; M, male; K, knee; H, hip.

| Patient | Sex | Age at surgery (years) | Joint replacement at surgery | rs6094710 genotype | Used for RT-PCR? |              |
|---------|-----|------------------------|------------------------------|--------------------|------------------|--------------|
|         |     |                        |                              |                    | <i>NCOA3</i>     | <i>SULF2</i> |
| 1       | F   | 67                     | K                            | GG                 | Yes              | No           |
| 2       | M   | 71                     | H                            | GG                 | Yes              | No           |
| 3       | F   | 67                     | H                            | GA                 | Yes              | Yes          |
| 4       | M   | 74                     | K                            | GG                 | Yes              | No           |
| 5       | F   | 83                     | H                            | GG                 | Yes              | No           |
| 6       | M   | 50                     | K                            | GG                 | Yes              | No           |
| 7       | M   | 76                     | K                            | GG                 | Yes              | No           |
| 8       | F   | 55                     | K                            | GG                 | Yes              | No           |
| 9       | F   | 63                     | K                            | GG                 | Yes              | Yes          |
| 10      | M   | 57                     | K                            | GG                 | Yes              | Yes          |
| 11      | M   | 69                     | K                            | GA                 | Yes              | Yes          |
| 12      | M   | 74                     | K                            | GG                 | Yes              | Yes          |
| 13      | M   | 47                     | K                            | GG                 | Yes              | Yes          |
| 14      | F   | 69                     | K                            | GA                 | Yes              | Yes          |
| 15      | M   | 63                     | K                            | GG                 | Yes              | Yes          |
| 16      | F   | 61                     | H                            | GG                 | Yes              | Yes          |
| 17      | F   | 60                     | K                            | GA                 | Yes              | Yes          |
| 18      | F   | 66                     | K                            | GG                 | Yes              | Yes          |
| 19      | M   | 82                     | K                            | GG                 | Yes              | Yes          |
| 20      | F   | 54                     | K                            | GG                 | Yes              | Yes          |
| 21      | F   | 64                     | K                            | GG                 | Yes              | Yes          |
| 22      | M   | 63                     | K                            | GG                 | Yes              | Yes          |
| 23      | M   | 67                     | K                            | GG                 | Yes              | Yes          |
| 24      | F   | 80                     | K                            | GG                 | Yes              | Yes          |
| 25      | F   | 67                     | K                            | GG                 | Yes              | Yes          |
| 26      | M   | 64                     | K                            | GG                 | Yes              | Yes          |
| 27      | F   | 80                     | K                            | GG                 | Yes              | Yes          |
| 28      | F   | 64                     | K                            | GG                 | Yes              | Yes          |
| 29      | F   | 61                     | K                            | GA                 | Yes              | Yes          |
| 30      | F   | 80                     | K                            | GG                 | Yes              | Yes          |
| 31      | F   | 59                     | K                            | GG                 | Yes              | Yes          |
| 32      | M   | 74                     | K                            | GG                 | Yes              | Yes          |
| 33      | M   | 72                     | K                            | GG                 | Yes              | Yes          |
| 34      | M   | 71                     | H                            | GG                 | Yes              | Yes          |
| 35      | F   | 82                     | K                            | GG                 | Yes              | Yes          |
| 36      | M   | 71                     | K                            | GG                 | Yes              | Yes          |
| 37      | F   | 73                     | K                            | GA                 | Yes              | Yes          |

|    |   |    |   |    |     |     |
|----|---|----|---|----|-----|-----|
| 38 | M | 69 | K | GG | Yes | Yes |
| 39 | F | 58 | K | GG | Yes | Yes |
| 40 | F | 62 | K | GG | Yes | Yes |
| 41 | F | 59 | H | GG | Yes | Yes |
| 42 | F | 63 | K | GG | Yes | Yes |
| 43 | M | 78 | K | GG | Yes | Yes |
| 44 | M | 65 | K | GG | No  | No  |
| 45 | F | 68 | H | GG | No  | No  |
| 46 | M | 63 | K | GG | No  | No  |
| 47 | M | 49 | K | GG | Yes | Yes |
| 48 | M | 83 | K | GG | Yes | Yes |
| 49 | F | 60 | K | GG | Yes | Yes |
| 50 | M | 65 | K | GA | Yes | Yes |
| 51 | F | 70 | K | GG | No  | No  |
| 52 | F | 76 | K | GA | Yes | Yes |
| 53 | F | 76 | H | GA | Yes | Yes |
| 54 | F | 63 | K | GG | No  | No  |
| 55 | F | 68 | K | GG | No  | No  |
| 56 | M | 78 | H | GA | Yes | Yes |
| 57 | F | 70 | H | GG | No  | No  |
| 58 | F | 45 | H | GA | Yes | Yes |
| 59 | F | 68 | H | GA | Yes | Yes |
| 60 | F | 87 | K | GA | Yes | Yes |
| 61 | F | 56 | K | GA | Yes | Yes |
| 62 | F | 77 | K | GA | Yes | Yes |
| 63 | M | 73 | H | GG | No  | No  |
| 64 | F | 51 | H | GG | Yes | Yes |
| 65 | F | 61 | H | GG | No  | No  |

---

**Table S2.** Primer and probe sequences used for the quantitative real-time reverse transcription PCR (RT-PCR) of a panel of genes. The *NCOA3* primers are not listed and were purchased from Applied Biosystems as an off-the-shelf TaqMan Gene Expression Assay. Also listed are the primers used for the pyrosequencing analysis of SNPs rs6094710, rs6094752 and rs3810526. FP, forward primer; RP, reverse primer; SP, sequencing primer; Pr, probe

| RT-PCR assay   | Primer sequence (5'-3')                                                                           |
|----------------|---------------------------------------------------------------------------------------------------|
| <i>Gene</i>    |                                                                                                   |
| <i>SULF2</i>   | FP: TGTCATTGTCTCTCTTGTGTAGC<br>RP: AATCCATCCTCAAGCTGCTG<br>Pr: CCCGCCAGACCCTCATCTTCTTT            |
| <i>COL1A1</i>  | FP: CCCCTGGAAAGAATGGAGATG<br>RP: TCCAAACCACTGAAACCTCTG<br>Pr: TTCCGGGCAATCCTCGAGCA                |
| <i>COL2A1</i>  | FP: ACCTTCATGGCGTCCAAG<br>RP: AACCAGATTGAGAGCATCCG<br>Pr: AGACCTGAAACTCTGCCACCCTG                 |
| <i>ACAN</i>    | FP: TGTGGGACTGAAGTTCTTGG<br>RP: AGCGAGTTGTCATGGTCTG<br>Pr: CTGGGTTTTTCGTGACTCTGAGGGT              |
| <i>SOX9</i>    | FP: CTGGTACTTGTAATCCGGGTG<br>RP: ACTTGCACAACGCCGAG<br>Pr: TCTGGAGACTTCTGAACGAGAGCGA               |
| <i>TIMP1</i>   | FP: TTCTGCAATTCGACCTCG<br>RP: TCATAACGCTGGTATAAGGTGG<br>Pr: TTGACTTCTGGTGTCCCCACGAAC              |
| <i>RUNX2</i>   | FP: TGAAGACGGTTATGGTCAAGG<br>RP: AGCAAGGTTCAACGATCTGAG<br>Pr: CGGAGTGGACGAGGCAAGAGTTTC            |
| <i>ADAMTS5</i> | FP: CAAGTGCGGAGTATGTGGAG<br>RP: GTCTTTGGCTTTGAACTGTCTG<br>Pr: TTTATGTGGGTTGCCCTTCAGGA             |
| <i>MMP1</i>    | FP: AAGATGAAAGGTGGACCAACAATT<br>RP: CCAAGAGAATGGCCGAGTTC<br>Pr: CAGAGAGTACAACCTTACATCGTGTGCGGCTC  |
| <i>MMP13</i>   | FP: AAATTATGGAGGAGATGCCCATTT<br>RP: TCCTTGGAGTGGTCAAGACCTAA<br>Pr: CTACAACCTGTTTTCTTGTGCTGCGCATGA |
| <i>HPRT1</i>   | FP: TGCTGAGGATTTGAAAGGG<br>RP: ACAGAGGGCTACAATGTGATG<br>Pr: AGGACTGAACGTCTTGCTCGAGATG             |
| <i>GAPDH</i>   | FP: ACATCGCTCAGACACCATG<br>RP: TGTAGTTGAGGTCAATGAAGGG                                             |



*H18S*  
 Pr: AAGGTCGGAGTCAACGGATTTGGTC  
 FP: CGAATGGCTCATTAAATCAGTTATGG  
 RP: TATTAGCTCTAGAATTACCACAGTTATCC  
 Pr: TCCTTTGGTCGCTCGCTCCTCTCCC

---

| <b>Pyrosequencing assay</b> | <b>Primer sequence (5'-3')</b>                                                              |
|-----------------------------|---------------------------------------------------------------------------------------------|
| <i>SNP</i>                  |                                                                                             |
| rs6094710                   | FP: biotin-GATTTTTTCACTGGGGATGGG<br>RP: CAAGTGAGCACGTACACAACTCC<br>SP: CACAACTCCAATAAACACAT |
| rs6094752                   | FP: biotin-TCCTGGACAAATGAGACCCA<br>RP: TCCTCCATCATAGCTCGTGG<br>SP: GCATTGTTTCATATCTCTG      |
| rs3810526                   | FP: biotin-GGCGAGGAGCAGTTCTCATT<br>RP: CAGGCTCCTCCATCCTCA<br>SP: GCTCCTCCATCCTCAC           |

---

**Table S3.** The twelve DNA fragments examined by luciferase analysis. Chromosome locations based on UCSC genome browser, release hg19. The sites in the cloning primers for the restriction enzymes MluI (ACGCGT) and XhoI (CTCGAG) are highlighted in bold.

| SNP         | Alleles (major/minor) | Chr 20 location (bp) | Primers used to clone SNP into pGL3-Promoter vector (5'-3')                               | Amplicon size (bp) |
|-------------|-----------------------|----------------------|-------------------------------------------------------------------------------------------|--------------------|
| rs6094710   | G/A                   | 46095649             | GGGG <b>ACGCGT</b> TCAAGTGATCCTCCACCTC<br>GGGG <b>CTCGAG</b> CACACACCAGGAATGTCAGG         | 564                |
| rs73122077  | C/T                   | 46099108             | GGGG <b>ACGCGT</b> CGGATCACAAGGTCAGGAGA<br>GGGG <b>CTCGAG</b> ACCACACCTGGCCCATACAT        | 264                |
| rs6090683   | G/C                   | 46102010             | GGGG <b>ACGCGT</b> CCATAGAGCCCACAGCCTAA<br>GGGG <b>CTCGAG</b> TCAGCTCACTGCAACCTCTG        | 524                |
| rs6090684   | G/A                   | 46103397             | GGGG <b>ACGCGT</b> TGAGAGGGAGTCTTGCACTG<br>GGGG <b>CTCGAG</b> TGTTACAAGCTGGATGTGGTG       | 637                |
| rs116855380 | A/G                   | 46120294             | GGGG <b>ACGCGT</b> GTCCAGGCTGGTCTCGAACTC<br>GGGG <b>CTCGAG</b> AAAAAGTTGTGGATACATTGTAGGTG | 279                |
| rs117212926 | G/A                   | 46199500             | GGGG <b>ACGCGT</b> AAAAGCAGGGAGCAACTCCT<br>GGGG <b>CTCGAG</b> CATTAACGGTGCACGTGGT         | 482                |
| rs72662711  | T/C                   | 46201921             | GGGG <b>ACGCGT</b> TGGCCATTTCTAGCTTTTG<br>GGGG <b>CTCGAG</b> GATCTCAGCTCTCGGCTCAC         | 523                |
| rs6090704   | G/A                   | 46230204             | GGGG <b>ACGCGT</b> GTGGGAGCAAGAACTCAAGG<br>GGGG <b>CTCGAG</b> CCCACCAGCTGCATGTAAT         | 558                |
| rs6094752   | C/T                   | 46256424             | GGGG <b>ACGCGT</b> TTGCCAGCCTGAAATGTTAGT<br>GGGG <b>CTCGAG</b> GGCGTGCCACACAGATCATAC      | 528                |
| rs72645259  | T/C                   | 46260639             | GGGG <b>ACGCGT</b> TGTCCCTGCTGGCTTACTTT<br>GGGG <b>CTCGAG</b> CATTTCCGGATTTCTTGAGC        | 512                |
| rs73913405  | C/T                   | 46288255             | GGGG <b>ACGCGT</b> TGAGAACAAACAAAGGGTGGT<br>GGGG <b>CTCGAG</b> GTTGGGGTTGTTTTGCCTAA       | 505                |
| rs73913406  | T/G                   | 46289063             | GGGG <b>ACGCGT</b> CAGGCATGAACATCTGTGCT<br>GGGG <b>CTCGAG</b> TTTAAGGTCCCTTGGGGAAG        | 503                |

**Table S4.** Electrophoretic mobility shift assay (EMSA) probes and competitors. The bold and underlined bases in the EMSA probes indicate the position of rs116855380. The series of underlined bases in the transcription factor competitors indicate the site of the consensus sequence for each factor.

| <b>Probe</b>                        | <b>Primer sequence (5'-3')</b>                                                        |
|-------------------------------------|---------------------------------------------------------------------------------------|
| <b><i>DY-682 EMSA probes</i></b>    |                                                                                       |
| rs116855380 A allele                | TATTTGTAACACAAAA <b>A</b> AAAGGCCTATTATAC<br>GTATAATAGGCCTTT <b>T</b> TTTGTGTTACAAATA |
| rs116855380 G allele                | TATTTGTAACACAAA <b>G</b> AAAGGCCTATTATAC<br>GTATAATAGGCCTTT <b>C</b> TTTGTGTTACAAATA  |
| <b><i>Consensus competitors</i></b> |                                                                                       |
| TCF-4                               | CCACCGTAG <b>TTCAAAG</b> GATCGCACGCCCCAT<br>ATGGGGCGTGGGATC <b>CTTTGAA</b> CTACGGTGG  |
| LEF-1                               | CCACCGTAG <b>GATCAAAG</b> GATCGCACGCCCCAT<br>ATGGGGCGTGGGATC <b>CTTTGATC</b> TACGGTGG |
| HLF                                 | CCAC <b>GGTTACGTA</b> ATAGATCGCACGCCCCAT<br>ATGGGGCGTGGGATC <b>TATTACGTA</b> ACCGTGG  |
| SRF                                 | CCACCG <b>TATGACCAA</b> ATAAGGCAAGGCCCAT<br>ATGGGG <b>CTTGCC</b> TATTTGGTCATACGGTGG   |
| MEF-2C                              | CCACCGTAG <b>GCAGTACG</b> ATCGCACGCCCCAT<br>ATGGGGCGTGGGATC <b>GTA</b> CTGCCTACGGTGG  |

**Table S5.** Antibodies used for supershift electrophoretic mobility shift assays

| <b>Antibody name</b>  | <b>Company</b>           | <b>Catalogue number</b> |
|-----------------------|--------------------------|-------------------------|
| IgG from rabbit serum | Sigma                    | I5006                   |
| TCF4 (H-125)          | Santa Cruz Biotechnology | sc-13027 X              |
| HLF (H-71)            | Santa Cruz Biotechnology | sc-367607               |
| C/EBP $\beta$ (C-19)  | Santa Cruz Biotechnology | sc-150 X                |
| DABP (H-40)           | Santa Cruz Biotechnology | sc-98411 X              |
